# Supplementary material
Source: Research Square preprint supplement (doi:10.21203/rs.3.rs-10117205/v1)
Supplement: Supplementary file 1 [file cf959dc9c7afb9f7431da432.docx]

**Supplementary Table 1.** Baseline characteristics, comorbidities, and clinical outcomes of the three study cohorts: (a) the MIMIC-IV main analytic cohort, (b) the eICU-CRD zero-shot validation cohort, and (c) the MC-MED held-out test cohort. Continuous variables are reported as median (interquartile range, IQR) and categorical variables as n (%).

**(a) MIMIC-IV main analytic cohort**

| **Section** | **Characteristic** | **Value** |
| --- | --- | --- |
| **Cohort size** | Admissions, n | 305,732 |
| **Cohort size** | Unique patients, n | 138,113 |
| **Demographics** | Age, years, median (IQR) | 61 (47-74) |
| **Demographics** | Female sex, n (%) | 159,402 (52.1%) |
| **Demographics** | Male sex, n (%) | 146,330 (47.9%) |
| **Race/ethnicity** | White, n (%) | 209,428 (68.5%) |
| **Race/ethnicity** | Black, n (%) | 43,570 (14.3%) |
| **Race/ethnicity** | Hispanic, n (%) | 14,918 (4.9%) |
| **Race/ethnicity** | Asian, n (%) | 9,884 (3.2%) |
| **Race/ethnicity** | Native, n (%) | 651 (0.2%) |
| **Race/ethnicity** | Other, n (%) | 15,806 (5.2%) |
| **Race/ethnicity** | Unknown, n (%) | 11,475 (3.8%) |
| **Insurance** | Medicare, n (%) | 125,505 (41.1%) |
| **Insurance** | Medicaid, n (%) | 25,074 (8.2%) |
| **Insurance** | Other insurance, n (%) | 155,153 (50.7%) |
| **Admission** | Emergency or urgent, n (%) | 187,200 (61.2%) |
| **Admission** | Elective, n (%) | 9,494 (3.1%) |
| **Admission** | Observation, n (%) | 79,773 (26.1%) |
| **Admission** | Other, n (%) | 29,265 (9.6%) |
| **Admission** | Hospital length of stay, days, median (IQR) | 3.8 (2.2-6.7) |
| **Admission** | Any ICU stay, n (%) | 63,805 (20.9%) |
| **Comorbidity** | Charlson comorbidity index, median (IQR) | 0 (0-0) |
| **Comorbidity** | Prior admission, n (%) | 167,619 (54.8%) |
| **Comorbidity** | Congestive heart failure, n (%) | 15,425 (5.0%) |
| **Comorbidity** | Chronic pulmonary disease, n (%) | 15,549 (5.1%) |
| **Comorbidity** | Diabetes, n (%) | 19,690 (6.4%) |
| **Comorbidity** | Renal disease, n (%) | 15,852 (5.2%) |
| **Comorbidity** | Malignancy or metastatic disease, n (%) | 14,291 (4.7%) |
| **Outcomes** | In-hospital mortality, n (%) | 7,009 (2.3%) |
| **Outcomes** | 30-day readmission, n (%) | 65,918 (21.6%) |
| **Outcomes** | Acute kidney injury, n (%) | 84,817 (27.7%) |
| **Outcomes** | Sepsis, n (%) | 26,411 (8.6%) |

**(b) eICU-CRD zero-shot validation cohort**

| **Section** | **Characteristic** | **Value** |
| --- | --- | --- |
| **Cohort size** | ICU stays, n | 108,324 |
| **Cohort size** | Unique patients, n | 94,259 |
| **Cohort size** | Hospitals in source dataset, n | 208 |
| **Cohort size** | Hospitals in filtered analytic file, n | 206 |
| **Demographics** | Age, years, median (IQR) | 66 (54-76) |
| **Demographics** | Female sex, n (%) | 49,565 (45.8%) |
| **Demographics** | Male sex, n (%) | 58,759 (54.2%) |
| **Race/ethnicity** | White, n (%) | 82,940 (76.6%) |
| **Race/ethnicity** | Black, n (%) | 12,479 (11.5%) |
| **Race/ethnicity** | Hispanic, n (%) | 4,088 (3.8%) |
| **Race/ethnicity** | Asian, n (%) | 1,854 (1.7%) |
| **Race/ethnicity** | Native, n (%) | 696 (0.6%) |
| **Race/ethnicity** | Unknown/other, n (%) | 6,267 (5.8%) |
| **Comorbidity** | Charlson comorbidity index, median (IQR) | 0 (0-0) |
| **Outcomes** | In-hospital mortality, n (%) | 9,482 (8.8%) |
| **Outcomes** | Acute kidney injury, n (%) | 13,450 (12.4%) |
| **Outcomes** | Sepsis, n (%) | 18,114 (16.7%) |

**(c) MC-MED held-out test cohort**

| **Section** | **Characteristic** | **Value** |
| --- | --- | --- |
| **Cohort size** | Held-out ED test visits, n | 11,792 |
| **Cohort size** | Unique patients/MRNs in held-out test set, n | 7,055 |
| **Cohort size** | Full MC-MED ED visits, n | 118,385 |
| **Cohort size** | Unique patients/MRNs in full cohort, n | 70,545 |
| **Demographics** | Age, years, median (IQR) | 54 (35-70) |
| **Demographics** | Female sex, n (%) | 6,619 (56.1%) |
| **Demographics** | Male/unknown sex, n (%) | 5,173 (43.9%) |
| **Race/ethnicity** | White, n (%) | 4,767 (40.4%) |
| **Race/ethnicity** | Black or African American, n (%) | 690 (5.9%) |
| **Race/ethnicity** | Asian, n (%) | 2,066 (17.5%) |
| **Race/ethnicity** | Other/declined/unknown race, n (%) | 4,269 (36.2%) |
| **Race/ethnicity** | Hispanic/Latino ethnicity, n (%) | 3,127 (26.5%) |
| **Payor** | Medicare, n (%) | 3,306 (28.0%) |
| **Payor** | Medicaid, n (%) | 1,443 (12.2%) |
| **Payor** | Missing/other payor, n (%) | 7,043 (59.7%) |
| **ED presentation** | Arrival by EMS, n (%) | 2,389 (20.3%) |
| **ED presentation** | Acuity 1 - resuscitation, n (%) | 97 (0.8%) |
| **ED presentation** | Acuity 2 - emergent, n (%) | 2,670 (22.6%) |
| **ED presentation** | Acuity 3 - urgent, n (%) | 7,765 (65.8%) |
| **ED presentation** | Acuity 4 - semi-urgent, n (%) | 1,132 (9.6%) |
| **ED presentation** | Acuity 5 - non-urgent, n (%) | 87 (0.7%) |
| **ED presentation** | Triage temperature, median (IQR) | 36.7 (36.5-36.8) |
| **ED presentation** | Triage heart rate, median (IQR) | 85 (74-97) |
| **ED presentation** | Triage respiratory rate, median (IQR) | 18 (16-18) |
| **ED presentation** | Triage oxygen saturation, median (IQR) | 99 (98-100) |
| **ED presentation** | Triage systolic blood pressure, median (IQR) | 135 (121-149) |
| **ED presentation** | Triage diastolic blood pressure, median (IQR) | 78 (69-88) |
| **Utilization** | ED length of stay, hours, median (IQR) | 5.3 (3.6-7.3) |
| **Utilization** | Hospital length of stay, days, median (IQR) | 3.0 (1.0-5.0) |
| **Outcomes** | Death by discharge disposition, n (%) | 77 (0.7%) |
| **Outcomes** | 30-day return visit, n (%) | 2,108 (17.9%) |
| **Outcomes** | ICU admission, n (%) | 270 (2.3%) |
| **Outcomes** | Inpatient admission, n (%) | 3,139 (26.6%) |

**Supplementary Table 2.** Model-family sensitivity analysis. Test-set area under the receiver operating characteristic curve (AUROC) per outcome for three classifier families, (a) Light Gradient Boosting Machine (LightGBM), (b) L2-regularised logistic regression, and (c) random forest, trained on the same feature sets. Ordering-only features remain predictive under all three model families, indicating that the predictive signal of test-ordering patterns is not specific to LightGBM.

**(a) LightGBM**

| **Outcome** | **Lab & vital-sign values** | **Test-ordering patterns** | **Combined** |
| --- | --- | --- | --- |
|  | AUROC | AUROC | AUROC |
| Mortality | 0.932 | 0.905 | 0.934 |
| 30-day readmission | 0.705 | 0.702 | 0.705 |
| AKI | 0.882 | 0.835 | 0.888 |
| Sepsis | 0.924 | 0.912 | 0.926 |

**(b) L2-regularised logistic regression**

| **Outcome** | **Lab & vital-sign values** | **Test-ordering patterns** | **Combined** |
| --- | --- | --- | --- |
|  | AUROC | AUROC | AUROC |
| Mortality | 0.922 | 0.904 | 0.927 |
| 30-day readmission | 0.679 | 0.676 | 0.683 |
| AKI | 0.846 | 0.821 | 0.865 |
| Sepsis | 0.897 | 0.902 | 0.912 |

**(c) Random forest**

| **Outcome** | **Lab & vital-sign values** | **Test-ordering patterns** | **Combined** |
| --- | --- | --- | --- |
|  | AUROC | AUROC | AUROC |
| Mortality | 0.926 | 0.892 | 0.925 |
| 30-day readmission | 0.684 | 0.688 | 0.687 |
| AKI | 0.869 | 0.820 | 0.879 |
| Sepsis | 0.911 | 0.905 | 0.914 |

**Supplementary Table 3.** Proportional contribution of each feature group to sepsis predictions in the combined LightGBM model, stratified by patient phenotype. Percentages represent the sum of absolute Shapley (SHAP) values for each feature group, divided by the total absolute SHAP magnitude across all features. Rows are mutually exclusive phenotype subgroups defined by joint patterns of measured values and test-ordering behavior; N is the number of patients in each subgroup.

| **Phenotype** | ***N*** | **Static (%)** | **Values (%)** | **Ordering (%)** |
| --- | --- | --- | --- | --- |
| Contradictory (high values, low ordering) | 15,889 | 30.1 | 32.2 | 37.7 |
| Concordant normal | 20,039 | 40.1 | 42.1 | 17.8 |
| Concordant abnormal | 26,287 | 29.1 | 30.3 | **40.6 ★★** |
| Deceptively normal | 18,450 | 26.5 | 53.8 | 19.7 ★ |

*Note.* Static = static baseline features; Values = laboratory and vital-sign values; Ordering = test-ordering pattern features. ★★ Ordering exceeds the contribution of measured values. ★ Ordering contributes substantially despite normal-appearing measured values. Rows sum to approximately 100% within each phenotype.

**Supplementary Table 4.** Discrimination by comorbidity burden on the MIMIC-IV held-out test set. AUROC with 95% bootstrap confidence interval (CI) is reported for three LightGBM classifiers, the test-ordering patterns model, the laboratory and vital sign values model, and the combined model, within four comorbidity strata defined by the Charlson Comorbidity Index (CCI): the overall test set (All); patients with no documented comorbidities (CCI = 0; 84.4% of the held-out test set); intermediate burden (CCI 1–3); and high burden (CCI ≥ 4). Results are reported per outcome: (a) in-hospital mortality, (b) 30-day readmission, (c) acute kidney injury (AKI), and (d) sepsis. The CCI = 0 row (bold) shows that performance of the test-ordering patterns model is essentially identical to that on the overall test set across all four outcomes, indicating that the ordering signal is not explained by chronic disease burden. N (events) denotes the number of admissions in the stratum and the number of positive outcomes.

**(a) In-hospital mortality**

| **Stratum** | **N (events)** | **Test-ordering patterns** | **Lab & vital sign values** | **Combined** |
| --- | --- | --- | --- | --- |
|  |  | AUROC (95% CI) | AUROC (95% CI) | AUROC (95% CI) |
| All | 45,805 (1,088) | 0.905 (0.896–0.913) | 0.932 (0.925–0.939) | 0.934 (0.927–0.941) |
| **CCI = 0** | 38,627 (879) | **0.912 (0.903–0.921)** | **0.938 (0.930–0.946)** | **0.939 (0.932–0.946)** |
| CCI 1–3 | 3,322 (70) | 0.875 (0.835–0.913) | 0.907 (0.868–0.939) | 0.917 (0.882–0.948) |
| CCI ≥ 4 | 3,856 (139) | 0.851 (0.818–0.880) | 0.889 (0.863–0.912) | 0.886 (0.859–0.914) |

**(b) 30-day readmission**

| **Stratum** | **N (events)** | **Test-ordering patterns** |  | **Lab & vital sign values** | **Combined** |
| --- | --- | --- | --- | --- | --- |
|  |  | AUROC (95% CI) |  | AUROC (95% CI) | AUROC (95% CI) |
| All | 44,717 (9,607) | 0.702 (0.696–0.707) |  | 0.705 (0.699–0.711) | 0.705 (0.699–0.711) |
| **CCI = 0** | 37,748 (7,538) | **0.695 (0.689–0.702)** |  | **0.699 (0.693–0.706)** | **0.699 (0.692–0.705)** |
| CCI 1–3 | 3,252 (880) | 0.717 (0.698–0.738) |  | 0.714 (0.693–0.733) | 0.712 (0.693–0.731) |
| CCI ≥ 4 | 3,717 (1,189) | 0.664 (0.645–0.683) |  | 0.670 (0.650–0.687) | 0.669 (0.650–0.688) |

**(c) Acute kidney injury (AKI)**

| **Stratum** | **N (events)** | **Test-ordering patterns** | **Lab & vital sign values** | **Combined** |
| --- | --- | --- | --- | --- |
|  |  | AUROC (95% CI) | AUROC (95% CI) | AUROC (95% CI) |
| All | 45,805 (12,639) | 0.835 (0.831–0.839) | 0.882 (0.879–0.885) | 0.888 (0.885–0.892) |
| **CCI = 0** | 38,627 (9,859) | **0.836 (0.832–0.840)** | **0.883 (0.880–0.887)** | **0.891 (0.887–0.894)** |
| CCI 1–3 | 3,322 (879) | 0.783 (0.765–0.800) | 0.837 (0.822–0.852) | 0.840 (0.824–0.855) |
| CCI ≥ 4 | 3,856 (1,901) | 0.801 (0.788–0.815) | 0.857 (0.846–0.869) | 0.863 (0.851–0.873) |

**(d) Sepsis**

| **Stratum** | **N (events)** | **Test-ordering patterns** | **Lab & vital sign values** | **Combined** |
| --- | --- | --- | --- | --- |
|  |  | AUROC (95% CI) | AUROC (95% CI) | AUROC (95% CI) |
| All | 45,805 (3,932) | 0.912 (0.907–0.917) | 0.924 (0.919–0.928) | 0.926 (0.921–0.930) |
| **CCI = 0** | 38,627 (3,171) | **0.918 (0.913–0.923)** | **0.929 (0.924–0.934)** | **0.931 (0.927–0.936)** |
| CCI 1–3 | 3,322 (277) | 0.890 (0.868–0.910) | 0.895 (0.876–0.914) | 0.896 (0.875–0.916) |
| CCI ≥ 4 | 3,856 (484) | 0.865 (0.847–0.883) | 0.889 (0.871–0.905) | 0.888 (0.871–0.904) |

**Supplementary Table 5.** Subgroup discrimination across demographic and insurance strata on the MIMIC-IV held-out test set. AUROC with 95% bootstrap confidence interval (CI) is reported for the test-ordering patterns model, the laboratory and vital sign values model, and the combined model. Panels (a)–(d) report performance for the four outcomes by self-identified race/ethnicity; panel (e) reports performance by insurance type, with rows grouped by outcome. The All-cohort row (bold) is shown in each race panel for reference. N (events) denotes the number of admissions in the subgroup and the number of positive outcomes. *Native American group reported for completeness only; small sample size (1 mortality event; 12 sepsis events; 22 readmission events; 46 AKI events) precludes stable estimation. The Combined column is omitted for the insurance panel because the combined-model fits were not estimated within insurance strata.

**(a) In-hospital mortality by race / ethnicity**

| **Race / ethnicity** | **N (events)** | **Test-ordering** | **Lab & vitals** | **Combined** |
| --- | --- | --- | --- | --- |
|  |  | AUROC (95% CI) | AUROC (95% CI) | AUROC (95% CI) |
| **All** | 45,805 (1,088) | **0.905 (0.896–0.913)** | **0.932 (0.925–0.939)** | **0.934 (0.927–0.941)** |
| White | 30,999 (712) | 0.888 (0.878–0.899) | 0.921 (0.910–0.931) | 0.924 (0.914–0.933) |
| Black | 6,742 (100) | 0.925 (0.898–0.951) | 0.943 (0.920–0.961) | 0.942 (0.919–0.962) |
| Hispanic | 2,418 (29) | 0.904 (0.832–0.963) | 0.948 (0.908–0.976) | 0.937 (0.890–0.973) |
| Asian | 1,493 (36) | 0.912 (0.881–0.938) | 0.927 (0.886–0.959) | 0.929 (0.892–0.958) |
| Other | 2,282 (45) | 0.928 (0.897–0.953) | 0.934 (0.892–0.964) | 0.938 (0.899–0.966) |
| Unknown | 1,764 (165) | 0.907 (0.886–0.927) | 0.946 (0.931–0.957) | 0.945 (0.929–0.960) |
| Native* | 107 (1) | — | — | — |

**(b) 30-day readmission by race / ethnicity**

| **Race / ethnicity** | **N (events)** | **Test-ordering** | **Lab & vitals** | **Combined** |
| --- | --- | --- | --- | --- |
|  |  | AUROC (95% CI) | AUROC (95% CI) | AUROC (95% CI) |
| **All** | 44,717 (9,607) | **0.702 (0.696–0.707)** | **0.705 (0.699–0.711)** | **0.705 (0.699–0.710)** |
| White | 30,287 (6,638) | 0.687 (0.680–0.694) | 0.693 (0.686–0.701) | 0.692 (0.684–0.699) |
| Black | 6,642 (1,498) | 0.710 (0.696–0.725) | 0.712 (0.699–0.726) | 0.712 (0.695–0.727) |
| Hispanic | 2,389 (577) | 0.723 (0.698–0.747) | 0.724 (0.699–0.747) | 0.726 (0.704–0.749) |
| Asian | 1,457 (284) | 0.712 (0.677–0.744) | 0.714 (0.677–0.747) | 0.721 (0.688–0.755) |
| Other | 2,237 (420) | 0.713 (0.687–0.741) | 0.709 (0.681–0.738) | 0.709 (0.682–0.733) |
| Unknown | 1,599 (168) | 0.768 (0.727–0.812) | 0.754 (0.710–0.800) | 0.757 (0.714–0.800) |
| Native* | 106 (22) | 0.516 (0.392–0.633) | 0.543 (0.400–0.679) | 0.527 (0.408–0.648) |

**(c) Acute kidney injury (AKI) by race / ethnicity**

| **Race / ethnicity** | **N (events)** | **Test-ordering** | **Lab & vitals** | **Combined** |
| --- | --- | --- | --- | --- |
|  |  | AUROC (95% CI) | AUROC (95% CI) | AUROC (95% CI) |
| **All** | 45,805 (12,639) | **0.835 (0.831–0.839)** | **0.882 (0.878–0.885)** | **0.888 (0.885–0.892)** |
| White | 30,999 (8,275) | 0.826 (0.821–0.831) | 0.876 (0.872–0.880) | 0.882 (0.878–0.886) |
| Black | 6,742 (2,170) | 0.846 (0.837–0.855) | 0.895 (0.887–0.902) | 0.903 (0.895–0.910) |
| Hispanic | 2,418 (596) | 0.853 (0.838–0.869) | 0.894 (0.880–0.908) | 0.898 (0.885–0.912) |
| Asian | 1,493 (353) | 0.859 (0.837–0.877) | 0.888 (0.869–0.907) | 0.896 (0.877–0.912) |
| Other | 2,282 (591) | 0.849 (0.833–0.864) | 0.884 (0.869–0.899) | 0.892 (0.878–0.906) |
| Unknown | 1,764 (608) | 0.848 (0.829–0.865) | 0.884 (0.869–0.900) | 0.892 (0.876–0.907) |
| Native* | 107 (46) | 0.892 (0.823–0.950) | 0.903 (0.844–0.953) | 0.920 (0.861–0.965) |

**(d) Sepsis by race / ethnicity**

| **Race / ethnicity** | **N (events)** | **Test-ordering** | **Lab & vitals** | **Combined** |
| --- | --- | --- | --- | --- |
|  |  | AUROC (95% CI) | AUROC (95% CI) | AUROC (95% CI) |
| **All** | 45,805 (3,932) | **0.912 (0.907–0.917)** | **0.924 (0.919–0.928)** | **0.926 (0.922–0.930)** |
| White | 30,999 (2,619) | 0.909 (0.902–0.915) | 0.921 (0.915–0.926) | 0.923 (0.918–0.928) |
| Black | 6,742 (452) | 0.906 (0.890–0.921) | 0.924 (0.910–0.937) | 0.923 (0.909–0.937) |
| Hispanic | 2,418 (151) | 0.910 (0.882–0.934) | 0.923 (0.896–0.946) | 0.925 (0.901–0.949) |
| Asian | 1,493 (151) | 0.915 (0.890–0.939) | 0.924 (0.900–0.944) | 0.929 (0.906–0.950) |
| Other | 2,282 (190) | 0.928 (0.908–0.947) | 0.944 (0.928–0.959) | 0.943 (0.925–0.958) |
| Unknown | 1,764 (357) | 0.915 (0.898–0.930) | 0.917 (0.900–0.932) | 0.921 (0.906–0.937) |
| Native* | 107 (12) | 0.884 (0.790–0.959) | 0.889 (0.795–0.960) | 0.890 (0.799–0.957) |

**(e) Discrimination by insurance type, across four outcomes**

| **Outcome / Insurance type** | **N (events)** | **Test-ordering** | **Lab & vitals** | **Combined** |
| --- | --- | --- | --- | --- |
|  |  | AUROC (95% CI) | AUROC (95% CI) | AUROC (95% CI) |
| ***In-hospital mortality*** |  |  |  |  |
| Medicaid | 3,800 (64) | 0.919 (0.886–0.946) | 0.941 (0.912–0.966) | — |
| Medicare | 18,425 (599) | 0.880 (0.866–0.894) | 0.910 (0.898–0.921) | — |
| Other | 23,580 (425) | 0.922 (0.910–0.933) | 0.948 (0.938–0.957) | — |
| ***30-day readmission*** |  |  |  |  |
| Medicaid | 3,736 (940) | 0.742 (0.724–0.760) | 0.743 (0.725–0.762) | — |
| Medicare | 17,826 (3,900) | 0.666 (0.656–0.676) | 0.669 (0.660–0.679) | — |
| Other | 23,155 (4,767) | 0.719 (0.711–0.727) | 0.723 (0.714–0.731) | — |
| ***Acute kidney injury (AKI)*** |  |  |  |  |
| Medicaid | 3,800 (847) | 0.844 (0.830–0.858) | 0.891 (0.879–0.903) | — |
| Medicare | 18,425 (6,532) | 0.801 (0.795–0.807) | 0.857 (0.851–0.862) | — |
| Other | 23,580 (5,260) | 0.849 (0.843–0.856) | 0.892 (0.888–0.897) | — |
| ***Sepsis*** |  |  |  |  |
| Medicaid | 3,800 (304) | 0.925 (0.908–0.940) | 0.934 (0.916–0.949) | — |
| Medicare | 18,425 (1,844) | 0.902 (0.894–0.910) | 0.914 (0.907–0.922) | — |
| Other | 23,580 (1,784) | 0.917 (0.910–0.924) | 0.929 (0.923–0.935) | — |

**Supplementary Table 6.** Subgroup discrimination across admission-timing strata on the MIMIC-IV held-out test set. AUROC with 95% bootstrap confidence interval (CI) is reported for the test-ordering patterns model, the laboratory and vital sign values model, and (where applicable) the combined model. Panel (a) stratifies by time of admission: Day (06–22) versus Night (22–06). Panel (b) stratifies by day of week: Weekday versus Weekend. Panel (c) provides a finer-grained breakdown into six four-hour admission windows. Panel (d) reports the Day/Night × Weekday/Weekend interaction across the four cells. The All-cohort row (bold) in panels (a) and (b) is shown for reference. N (events) denotes the number of admissions in the stratum and the number of positive outcomes. The Combined column is omitted in panels (c) and (d) because combined-model fits were not estimated within these finer strata. Across panels, the test-ordering patterns model shows tightly overlapping CIs between night and day admissions and between weekend and weekday admissions, indicating that the ordering signal is not primarily an artefact of admission timing or staffing patterns.

**(a) Discrimination by admission time of day (Day vs Night)**

| **Outcome / Admission time** | **N (events)** | **Test-ordering** | **Lab & vitals** | **Combined** |
| --- | --- | --- | --- | --- |
|  |  | AUROC (95% CI) | AUROC (95% CI) | AUROC (95% CI) |
| ***In-hospital mortality*** |  |  |  |  |
| **All** | 45,805 (1,088) | **0.905 (0.896–0.913)** | **0.932 (0.925–0.939)** | **0.934 (0.927–0.941)** |
| Day (06–22) | 32,139 (764) | 0.901 (0.890–0.911) | 0.928 (0.920–0.937) | 0.930 (0.921–0.938) |
| Night (22–06) | 13,666 (324) | 0.916 (0.901–0.930) | 0.942 (0.929–0.953) | 0.943 (0.932–0.954) |
| ***30-day readmission*** |  |  |  |  |
| **All** | 44,717 (9,607) | **0.702 (0.696–0.707)** | **0.705 (0.699–0.712)** | **0.705 (0.699–0.711)** |
| Day (06–22) | 31,375 (7,018) | 0.706 (0.699–0.713) | 0.709 (0.702–0.716) | 0.709 (0.702–0.716) |
| Night (22–06) | 13,342 (2,589) | 0.688 (0.677–0.700) | 0.692 (0.680–0.704) | 0.691 (0.680–0.703) |
| ***Acute kidney injury (AKI)*** |  |  |  |  |
| **All** | 45,805 (12,639) | **0.835 (0.831–0.839)** | **0.882 (0.878–0.885)** | **0.888 (0.885–0.892)** |
| Day (06–22) | 32,139 (8,886) | 0.835 (0.830–0.840) | 0.880 (0.876–0.884) | 0.887 (0.883–0.891) |
| Night (22–06) | 13,666 (3,753) | 0.834 (0.827–0.841) | 0.886 (0.880–0.892) | 0.891 (0.885–0.896) |
| ***Sepsis*** |  |  |  |  |
| **All** | 45,805 (3,932) | **0.912 (0.907–0.916)** | **0.924 (0.919–0.928)** | **0.926 (0.921–0.930)** |
| Day (06–22) | 32,139 (2,598) | 0.909 (0.903–0.915) | 0.922 (0.917–0.927) | 0.924 (0.919–0.929) |
| Night (22–06) | 13,666 (1,334) | 0.917 (0.909–0.925) | 0.927 (0.919–0.934) | 0.929 (0.921–0.936) |

**(b) Discrimination by admission day of week (Weekday vs Weekend)**

| **Outcome / Admission time** | **N (events)** | **Test-ordering** | **Lab & vitals** | **Combined** |
| --- | --- | --- | --- | --- |
|  |  | AUROC (95% CI) | AUROC (95% CI) | AUROC (95% CI) |
| ***In-hospital mortality*** |  |  |  |  |
| **All** | 45,805 (1,088) | **0.905 (0.897–0.914)** | **0.932 (0.925–0.940)** | **0.934 (0.926–0.940)** |
| Weekday | 32,676 (804) | 0.910 (0.900–0.920) | 0.933 (0.926–0.942) | 0.936 (0.928–0.944) |
| Weekend | 13,129 (284) | 0.892 (0.873–0.909) | 0.930 (0.915–0.943) | 0.929 (0.913–0.942) |
| ***30-day readmission*** |  |  |  |  |
| **All** | 44,717 (9,607) | **0.702 (0.696–0.707)** | **0.705 (0.700–0.711)** | **0.705 (0.699–0.710)** |
| Weekday | 31,872 (6,832) | 0.703 (0.696–0.710) | 0.708 (0.701–0.715) | 0.707 (0.700–0.715) |
| Weekend | 12,845 (2,775) | 0.699 (0.687–0.709) | 0.698 (0.686–0.708) | 0.698 (0.687–0.708) |
| ***Acute kidney injury (AKI)*** |  |  |  |  |
| **All** | 45,805 (12,639) | **0.835 (0.831–0.839)** | **0.882 (0.878–0.885)** | **0.888 (0.885–0.892)** |
| Weekday | 32,676 (8,980) | 0.835 (0.830–0.839) | 0.882 (0.878–0.886) | 0.888 (0.885–0.893) |
| Weekend | 13,129 (3,659) | 0.836 (0.828–0.843) | 0.881 (0.875–0.887) | 0.889 (0.883–0.894) |
| ***Sepsis*** |  |  |  |  |
| **All** | 45,805 (3,932) | **0.912 (0.907–0.917)** | **0.924 (0.920–0.928)** | **0.926 (0.921–0.930)** |
| Weekday | 32,676 (2,819) | 0.913 (0.907–0.919) | 0.924 (0.918–0.929) | 0.926 (0.921–0.931) |
| Weekend | 13,129 (1,113) | 0.909 (0.900–0.918) | 0.924 (0.916–0.932) | 0.926 (0.918–0.934) |

**(c) Discrimination by admission hour block (four-hour windows)**

| **Outcome / Admission time** | **N (events)** | **Test-ordering** | **Lab & vitals** | **Combined** |
| --- | --- | --- | --- | --- |
|  |  | AUROC (95% CI) | AUROC (95% CI) | AUROC (95% CI) |
| ***In-hospital mortality*** |  |  |  |  |
| 00–04 | 7,316 (140) | 0.904 (0.878–0.927) | 0.933 (0.911–0.951) | — |
| 04–08 | 4,928 (78) | 0.923 (0.890–0.950) | 0.930 (0.896–0.957) | — |
| 08–12 | 4,754 (65) | 0.941 (0.916–0.963) | 0.948 (0.919–0.970) | — |
| 12–16 | 7,701 (182) | 0.890 (0.869–0.911) | 0.922 (0.901–0.940) | — |
| 16–20 | 11,273 (310) | 0.890 (0.873–0.907) | 0.922 (0.909–0.937) | — |
| 20–24 | 9,833 (313) | 0.904 (0.888–0.920) | 0.939 (0.926–0.950) | — |
| ***30-day readmission*** |  |  |  |  |
| 00–04 | 7,176 (1,363) | 0.687 (0.671–0.702) | 0.691 (0.676–0.707) | — |
| 04–08 | 4,850 (846) | 0.700 (0.680–0.719) | 0.697 (0.677–0.717) | — |
| 08–12 | 4,689 (1,018) | 0.749 (0.732–0.765) | 0.750 (0.733–0.768) | — |
| 12–16 | 7,519 (1,700) | 0.715 (0.701–0.729) | 0.721 (0.708–0.735) | — |
| 16–20 | 10,963 (2,604) | 0.689 (0.678–0.701) | 0.691 (0.679–0.702) | — |
| 20–24 | 9,520 (2,076) | 0.678 (0.665–0.689) | 0.686 (0.673–0.699) | — |
| ***Acute kidney injury (AKI)*** |  |  |  |  |
| 00–04 | 7,316 (1,935) | 0.841 (0.832–0.851) | 0.887 (0.879–0.896) | — |
| 04–08 | 4,928 (1,009) | 0.850 (0.837–0.862) | 0.887 (0.876–0.897) | — |
| 08–12 | 4,754 (990) | 0.876 (0.865–0.887) | 0.903 (0.894–0.912) | — |
| 12–16 | 7,701 (2,096) | 0.831 (0.821–0.840) | 0.879 (0.871–0.887) | — |
| 16–20 | 11,273 (3,526) | 0.816 (0.808–0.824) | 0.865 (0.858–0.872) | — |
| 20–24 | 9,833 (3,083) | 0.819 (0.810–0.828) | 0.881 (0.874–0.888) | — |
| ***Sepsis*** |  |  |  |  |
| 00–04 | 7,316 (620) | 0.921 (0.910–0.931) | 0.923 (0.911–0.933) | — |
| 04–08 | 4,928 (381) | 0.926 (0.911–0.940) | 0.941 (0.929–0.952) | — |
| 08–12 | 4,754 (293) | 0.922 (0.906–0.937) | 0.932 (0.918–0.946) | — |
| 12–16 | 7,701 (585) | 0.917 (0.906–0.929) | 0.919 (0.907–0.932) | — |
| 16–20 | 11,273 (976) | 0.899 (0.888–0.910) | 0.917 (0.906–0.926) | — |
| 20–24 | 9,833 (1,077) | 0.903 (0.893–0.914) | 0.921 (0.911–0.929) | — |

**(d) Discrimination by Day/Night × Weekday/Weekend interaction**

| **Outcome / Admission time** | **N (events)** | **Test-ordering** | **Lab & vitals** | **Combined** |
| --- | --- | --- | --- | --- |
|  |  | AUROC (95% CI) | AUROC (95% CI) | AUROC (95% CI) |
| ***In-hospital mortality*** |  |  |  |  |
| Day + Weekday | 22,837 (563) | 0.907 (0.896–0.918) | 0.929 (0.918–0.939) | — |
| Day + Weekend | 9,302 (201) | 0.882 (0.857–0.903) | 0.927 (0.909–0.944) | — |
| Night + Weekday | 9,839 (241) | 0.917 (0.899–0.934) | 0.944 (0.931–0.957) | — |
| Night + Weekend | 3,827 (83) | 0.915 (0.889–0.939) | 0.935 (0.910–0.960) | — |
| ***30-day readmission*** |  |  |  |  |
| Day + Weekday | 22,274 (4,981) | 0.706 (0.699–0.714) | 0.710 (0.702–0.719) | — |
| Day + Weekend | 9,101 (2,037) | 0.704 (0.692–0.716) | 0.706 (0.693–0.720) | — |
| Night + Weekday | 9,598 (1,851) | 0.691 (0.677–0.705) | 0.699 (0.686–0.713) | — |
| Night + Weekend | 3,744 (738) | 0.681 (0.659–0.702) | 0.675 (0.653–0.697) | — |
| ***Acute kidney injury (AKI)*** |  |  |  |  |
| Day + Weekday | 22,837 (6,285) | 0.836 (0.830–0.841) | 0.881 (0.876–0.885) | — |
| Day + Weekend | 9,302 (2,601) | 0.834 (0.826–0.843) | 0.879 (0.871–0.886) | — |
| Night + Weekday | 9,839 (2,695) | 0.832 (0.824–0.840) | 0.886 (0.879–0.893) | — |
| Night + Weekend | 3,827 (1,058) | 0.839 (0.824–0.852) | 0.886 (0.874–0.896) | — |
| ***Sepsis*** |  |  |  |  |
| Day + Weekday | 22,837 (1,855) | 0.910 (0.903–0.917) | 0.923 (0.916–0.929) | — |
| Day + Weekend | 9,302 (743) | 0.907 (0.895–0.917) | 0.921 (0.911–0.930) | — |
| Night + Weekday | 9,839 (964) | 0.918 (0.909–0.928) | 0.925 (0.916–0.934) | — |
| Night + Weekend | 3,827 (370) | 0.914 (0.898–0.928) | 0.929 (0.916–0.943) | — |

**Supplementary Table 7.** Split conformal prediction coverage of the combined LightGBM model on the MIMIC-IV held-out test set, with calibration set 50:50 split from training. Target marginal coverage is 90%. Panel (a) reports coverage by ordering-intensity quartile within each outcome, comparing standard (global threshold) and Mondrian (per-quartile threshold) conformal calibration. Standard conformal coverage is severely degraded in the highest-ordering quartile for in-hospital mortality (Q4: 74.1%, against a 90% target) and sepsis (Q4: 75.0%), and over-covers the lowest-ordering quartile (Q1: 99.2% for mortality; 99.1% for sepsis). Mondrian conformal calibration restores coverage to within roughly 1 percentage point of the 90% target across all quartiles and all four outcomes (range 89.2–90.9%). Q4-high rows where standard conformal is most degraded (mortality and sepsis) are highlighted in vermilion. Panel (b) reports mortality coverage stratified by demographic subgroups (race aggregated to broad categories, insurance, sex, age quartile) using standard conformal calibration; subgroups whose coverage deviates ≥ 5 percentage points from the 90% target are highlighted. These findings indicate that subgroup-stratified (Mondrian) calibration is important before clinical deployment, particularly because the highest-ordering patients receive the least reliable uncertainty estimates under standard conformal prediction.

**(a) Conformal coverage by ordering-intensity quartile, standard vs Mondrian calibration**

| **Outcome / Ordering-intensity quartile** | **N (test)** | **Standard conformal** | **Mondrian conformal** | **Δ (Mondrian − Std)** |
| --- | --- | --- | --- | --- |
|  |  | Coverage (target 90%) | Coverage (target 90%) | percentage points |
| ***In-hospital mortality*** |  |  |  |  |
| Q1 (low ordering) | 11,672 | 99.2% | 90.1% | −9.1 pp |
| Q2 | 11,601 | 96.8% | 89.8% | −7.0 pp |
| Q3 | 11,241 | 89.1% | 90.3% | +1.2 pp |
| **Q4 (high ordering)** | 11,291 | **74.1%** | **89.8%** | **+15.7 pp** |
| ***30-day readmission*** |  |  |  |  |
| Q1 (low ordering) | 11,648 | 92.7% | 89.9% | −2.8 pp |
| Q2 | 11,528 | 91.5% | 89.9% | −1.6 pp |
| Q3 | 10,601 | 87.6% | 90.4% | +2.8 pp |
| Q4 (high ordering) | 10,940 | 89.0% | 90.5% | +1.5 pp |
| ***Acute kidney injury (AKI)*** |  |  |  |  |
| Q1 (low ordering) | 11,672 | 96.8% | 89.7% | −7.1 pp |
| Q2 | 11,601 | 89.2% | 90.1% | +0.9 pp |
| Q3 | 11,241 | 86.1% | 89.2% | +3.1 pp |
| **Q4 (high ordering)** | 11,291 | **86.2%** | **89.8%** | **+3.6 pp** |
| ***Sepsis*** |  |  |  |  |
| Q1 (low ordering) | 11,672 | 99.1% | 90.9% | −8.2 pp |
| Q2 | 11,601 | 95.0% | 90.5% | −4.5 pp |
| Q3 | 11,241 | 91.0% | 90.3% | −0.7 pp |
| Q4 (high ordering) | 11,291 | 75.0% | 90.3% | +15.3 pp |

**(b) Mortality marginal coverage by demographic subgroup (standard conformal)**

| **Subgroup** | **N (test)** | **Standard conformal coverage** | **Coverage gap (vs 90% target)** |
| --- | --- | --- | --- |
| ***Race / ethnicity (aggregated)*** |  |  |  |
| White | 31,171 | 89.3% | −0.7 pp |
| Black | 7,012 | 92.8% | +2.8 pp |
| Hispanic / Latino | 2,638 | 94.2% | +4.2 pp |
| Asian | 1,554 | 90.6% | +0.6 pp |
| American Indian / Alaska Native | 107 | 90.7% | +0.7 pp |
| Other / Multiple | 1,531 | 91.8% | +1.8 pp |
| Unknown / declined / unavailable | 1,764 | **81.5%** | **−8.5 pp** |
| ***Insurance*** |  |  |  |
| Medicare | 18,425 | 86.0% | −4.0 pp |
| Medicaid | 3,800 | 93.8% | +3.8 pp |
| Other | 23,580 | 92.4% | +2.4 pp |
| ***Sex*** |  |  |  |
| Female | 24,045 | 90.8% | +0.8 pp |
| Male | 21,760 | 89.0% | −1.0 pp |
| ***Age quartile*** |  |  |  |
| Q1 (youngest) | 11,703 | **97.2%** | **+7.2 pp** |
| Q2 | 11,406 | 92.2% | +2.2 pp |
| Q3 | 11,939 | 88.4% | −1.6 pp |
| Q4 (oldest) | 10,757 | **81.3%** | **−8.7 pp** |

**Supplementary Table 8.** Predictive performance after removing each outcome's defining tests from the test-ordering features: testing whether the AKI and sepsis signals are artefacts of outcome ascertainment.

| **Outcome (test removed)** | **Model** | **Full AUROC** | **AUROC after exclusion** | **Δ (95% CI)** | ***p*-value** |
| --- | --- | --- | --- | --- | --- |
| *AKI (− creatinine channel)* | Values | 0.883 | 0.883 | +0.0000 (+0.0000, +0.0000) | 1.000 |
|  | Test-ordering | 0.835 | 0.833 | −0.0015 (−0.0021, −0.0008) | <0.001 |
|  | Combined | 0.890 | 0.889 | −0.0007 (−0.0012, −0.0002) | 0.006 |
| *Sepsis (− antimicrobial flags)* | Values | 0.923 | 0.915 | −0.0083 (−0.0102, −0.0064) | <0.001 |
|  | Test-ordering | 0.913 | 0.897 | −0.0154 (−0.0178, −0.0128) | <0.001 |
|  | Combined | 0.926 | 0.918 | −0.0080 (−0.0100, −0.0061) | <0.001 |

**Supplementary Table 9.** Does test-ordering carry information beyond simple frequency summaries? A recurrent neural network on the raw 4-hour measurement-count trajectories versus the gradient-boosted summary model (five random initializations).

| **Outcome** | **GRU (raw counts + static), mean ± SD** | **LightGBM summaries** | **Paired Δ (GRU − LightGBM)** |
| --- | --- | --- | --- |
|  | AUROC | AUROC | AUROC |
| Mortality | 0.9123 ± 0.0007 | 0.9061 | +0.0062 ± 0.0007 |
| 30-day readmission | 0.6944 ± 0.0010 | 0.7004 | −0.0060 ± 0.0010 |
| AKI | 0.8346 ± 0.0005 | 0.8346 | −0.0000 ± 0.0005 |
| Sepsis | 0.9118 ± 0.0006 | 0.9124 | −0.0006 ± 0.0006 |
